# Supplementary material for: Representation of Present and Future of Mean and Extreme Precipitation in CMIP6 HighResMIP Simulation over West Africa
Source: Research Square preprint supplement (doi:10.21203/rs.3.rs-5743422/v1), 2025-01-28
Supplement: Supplementary file 1 [file 99a7fc8f3d5b3fb37fcc7861.docx]

SUPPLIMENTARY


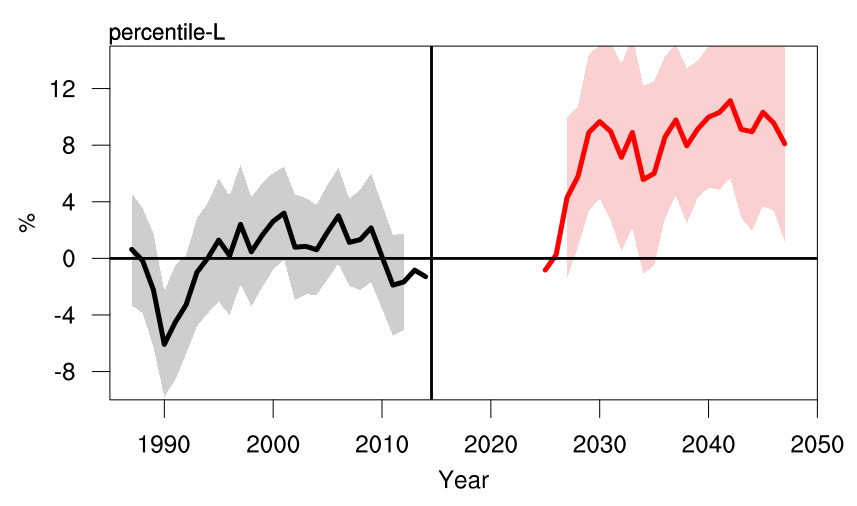


b


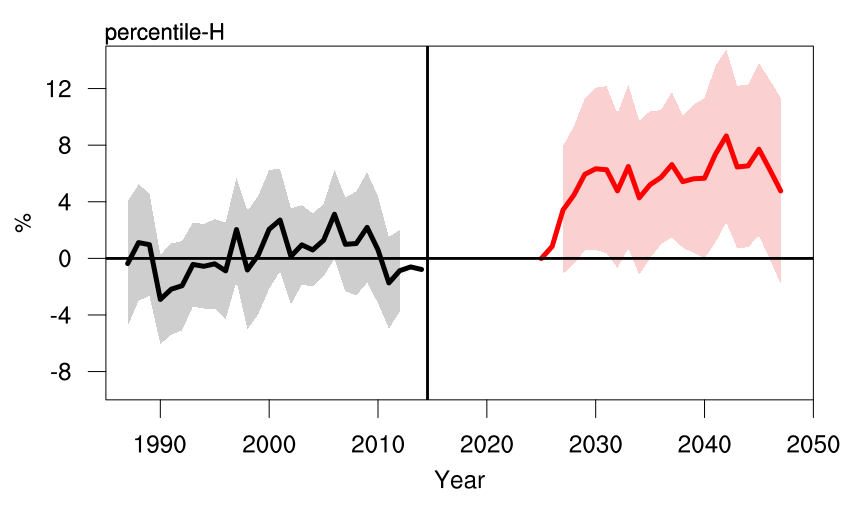


a


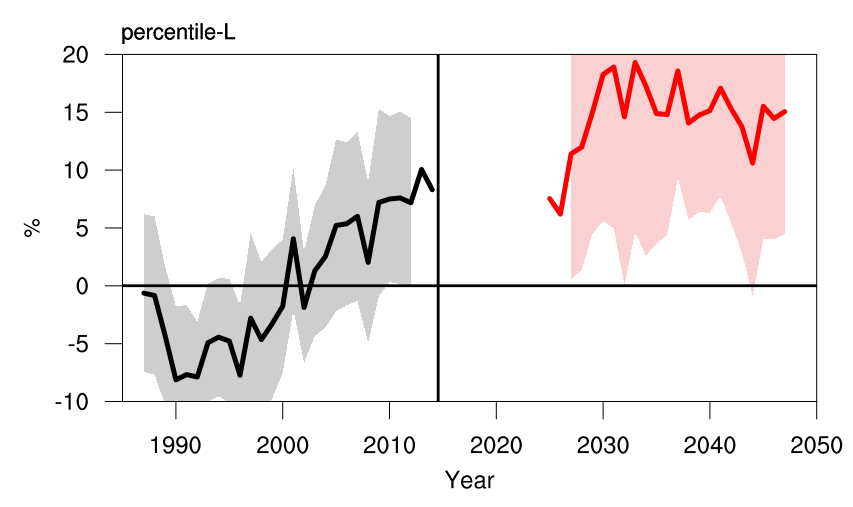


d


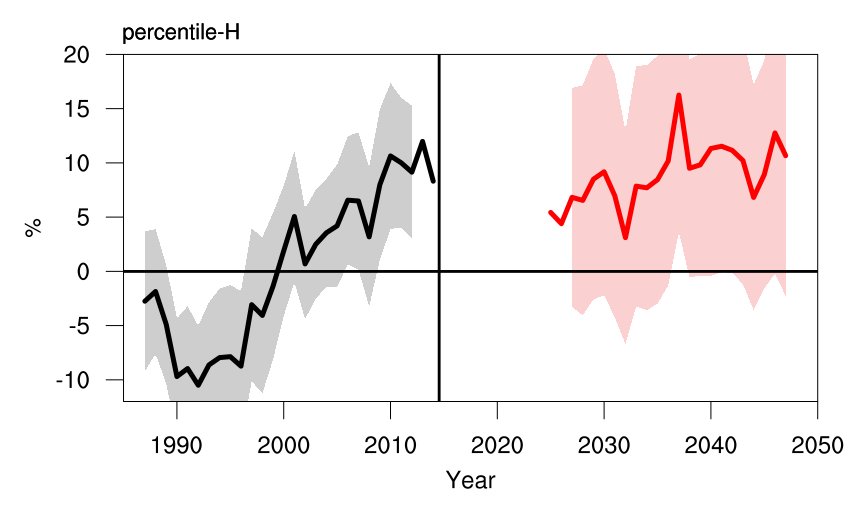


c

Figure S1. Temporal percentage change of R95p during 2025 – 2049 relative to the reference period 1985 – 2014 under SSP5-8.5 scenario average over West Africa. Solid lines represent the ENSEMBLE (high and low resolution simulation) and the shading depict 95% confidence in the CMIP6 HighResMIP ensemble members. The time series are smoothed with a 5-year running mean filter. Figure S1a, b depicts the percentage change over Guinea coast and Sahel between high and low resolution simulation.


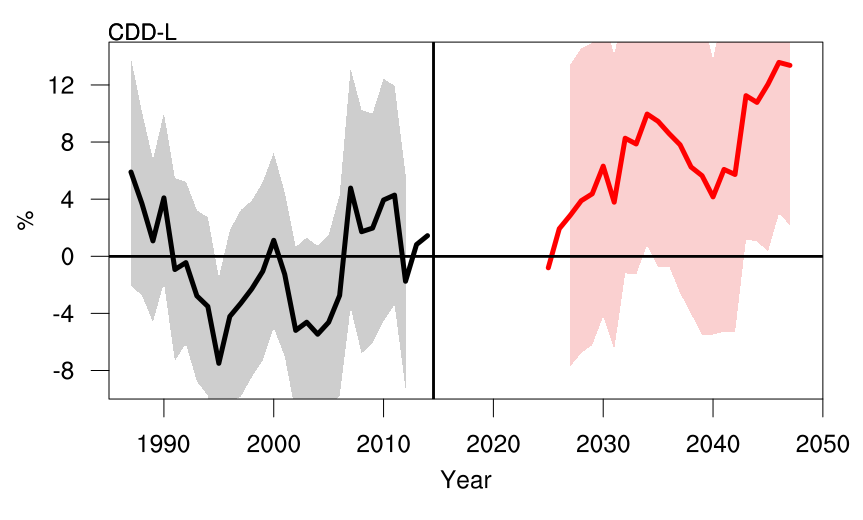


b


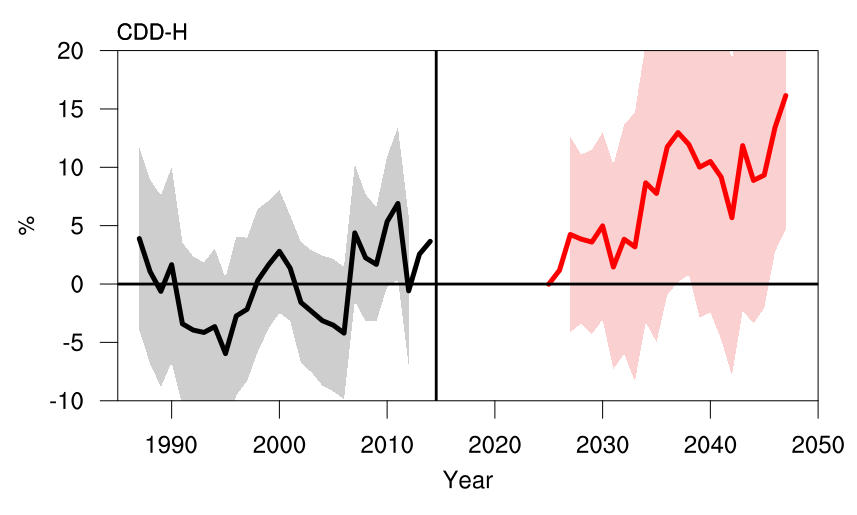


a


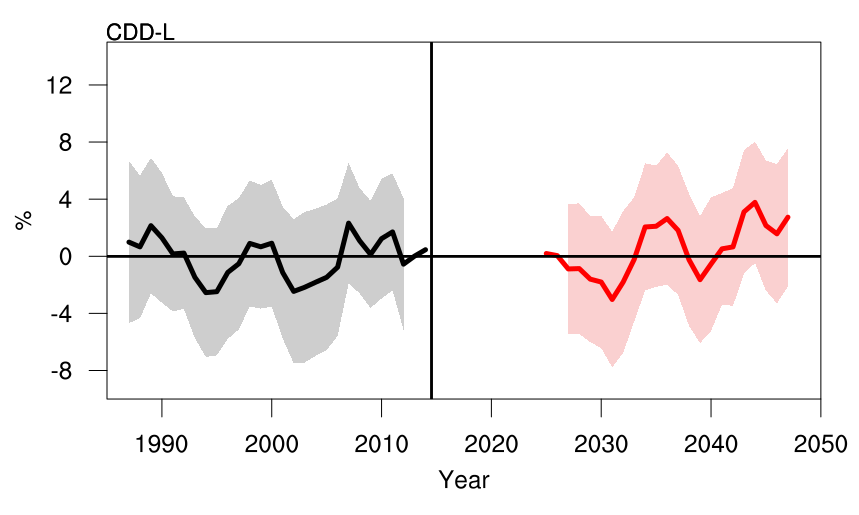


d


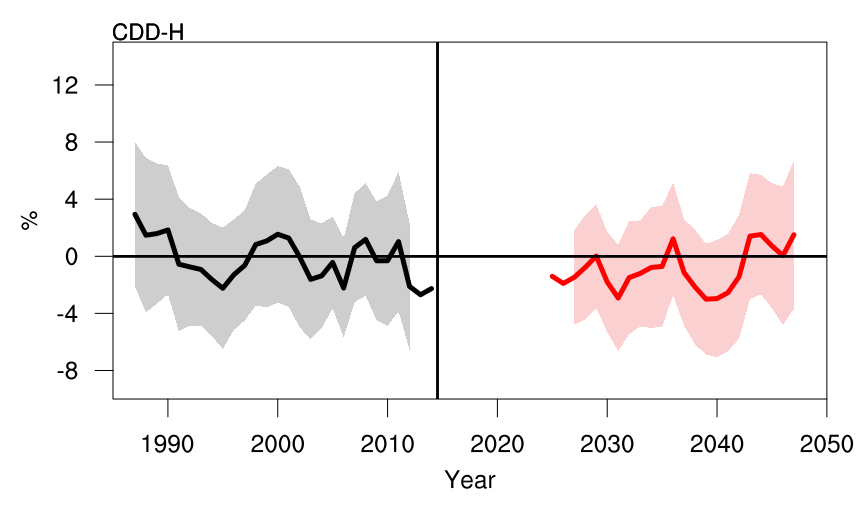


c

Figure S2. Same as figure S1 but for CDD


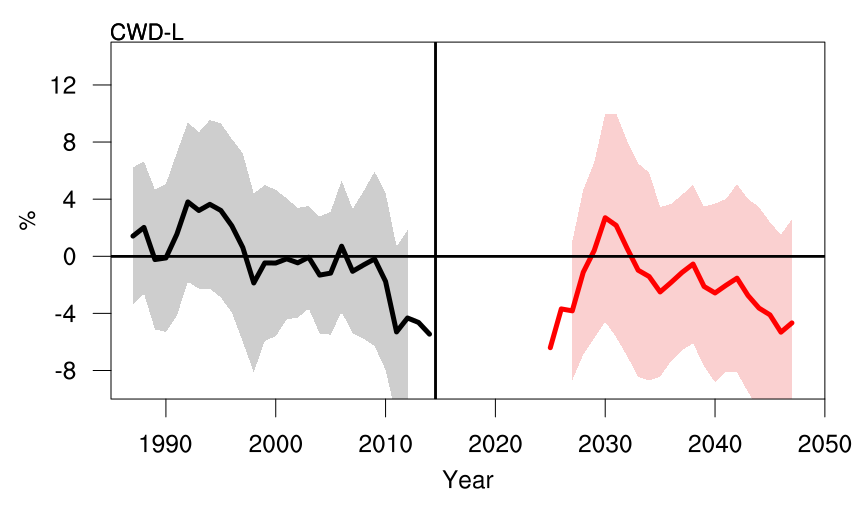


b


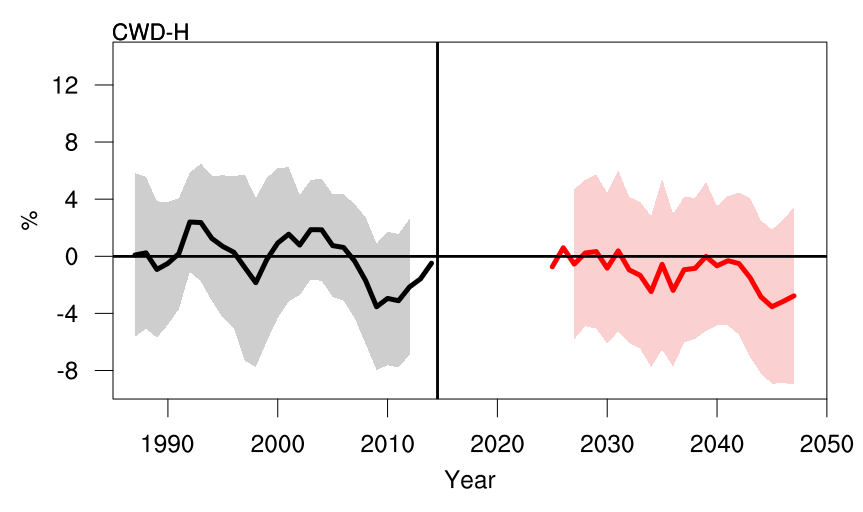


a


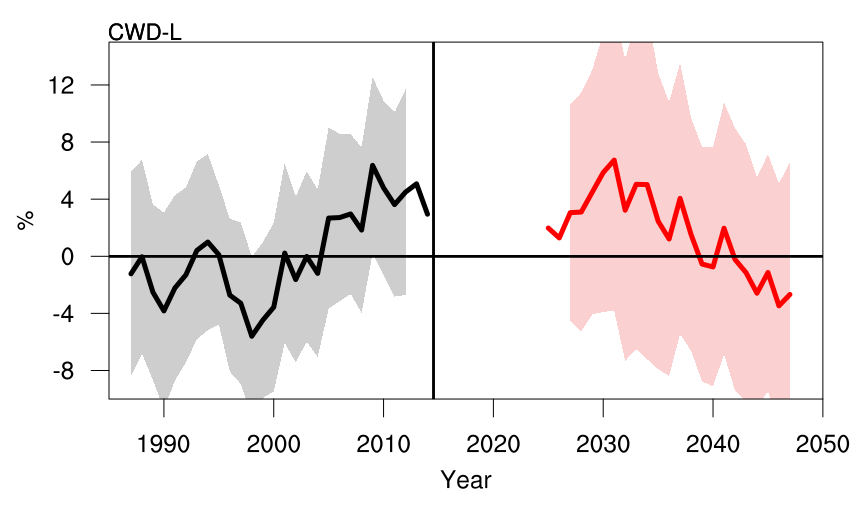


d


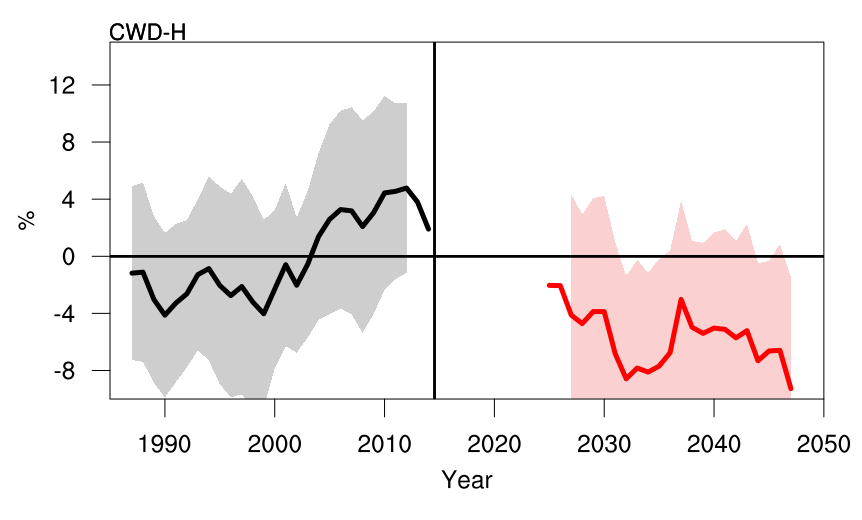


c

Figure S3. Same as figure S1 but for CWD


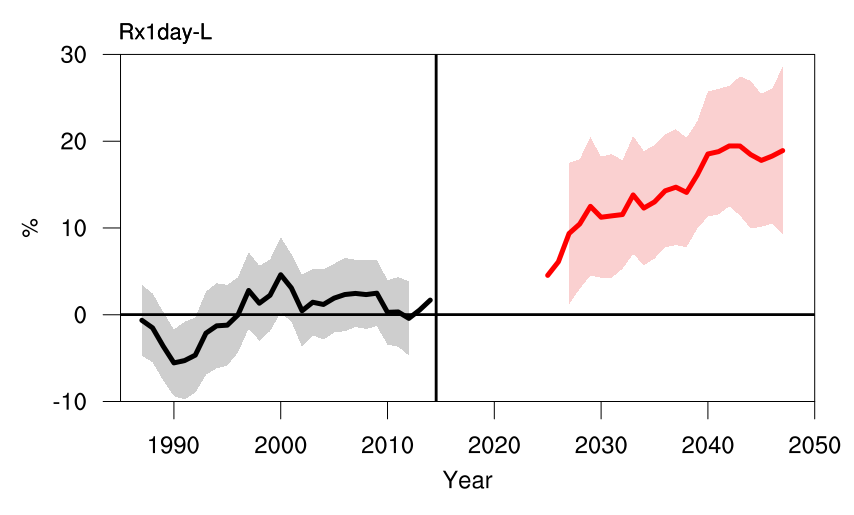


b


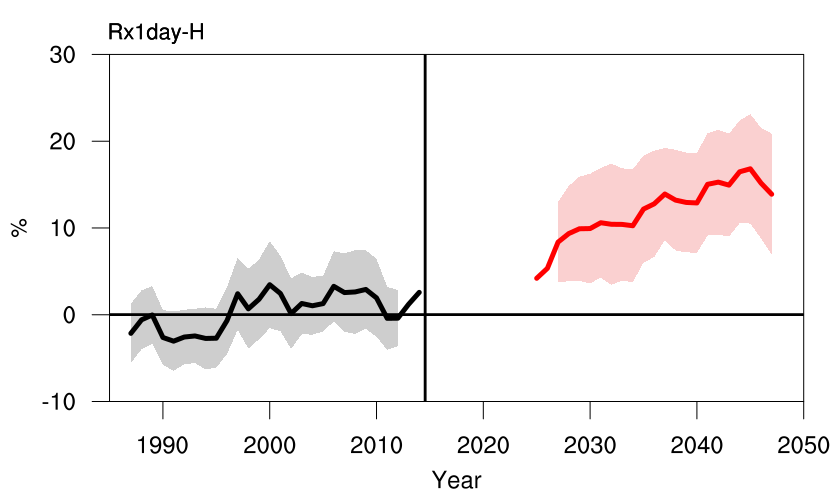


a


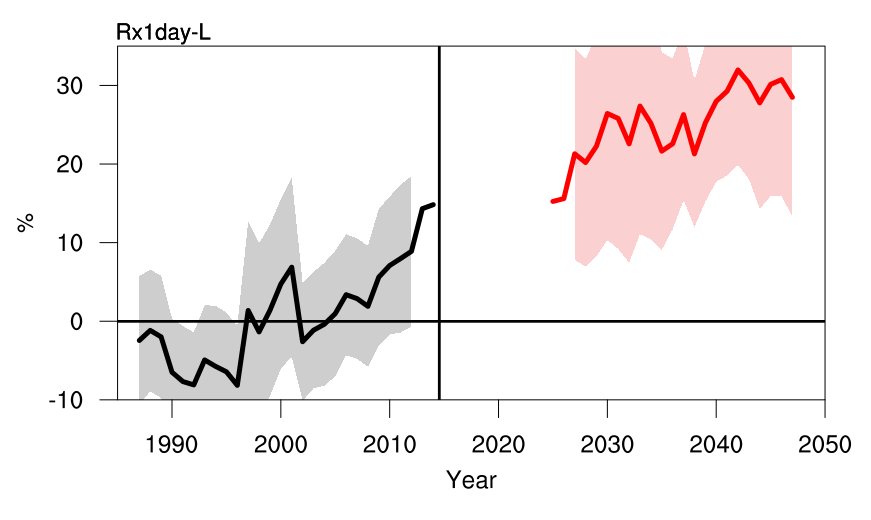


d


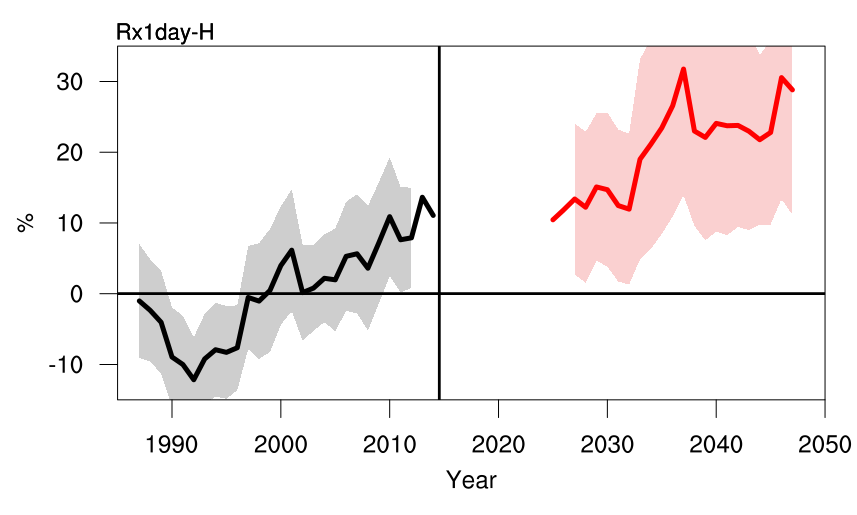


c

Figure S4. Same as figure S1 but for Rx1day


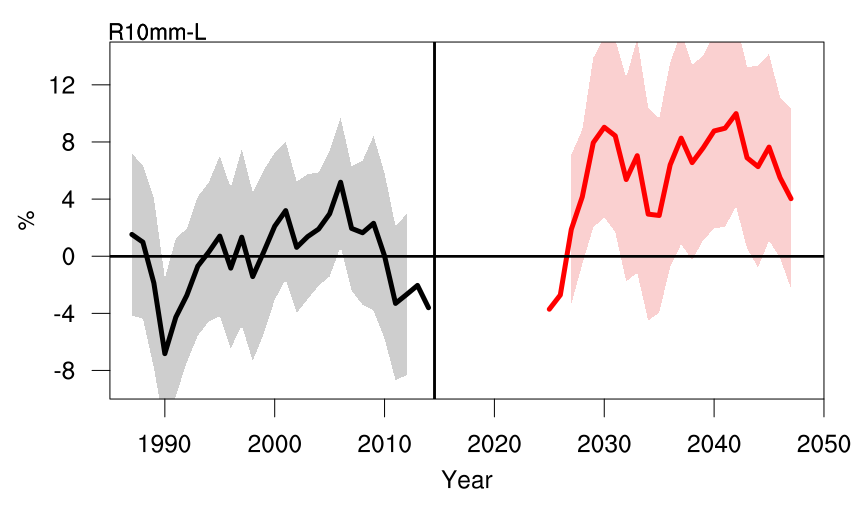


b


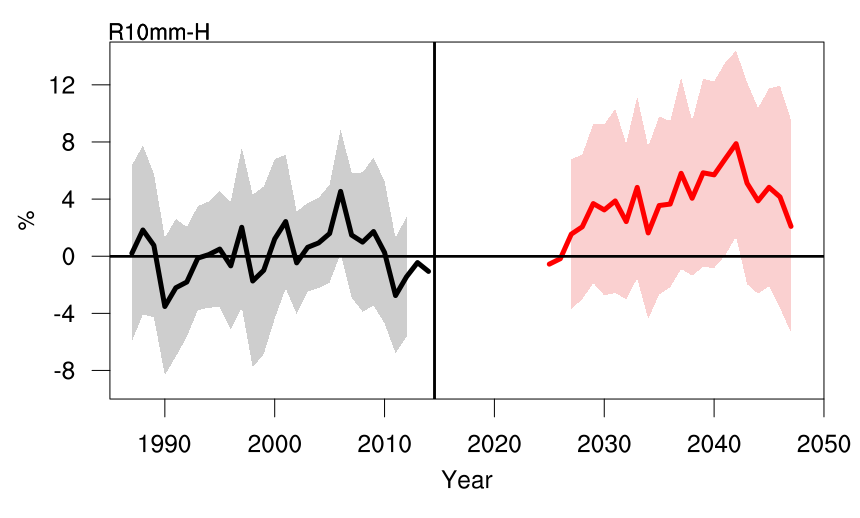


a


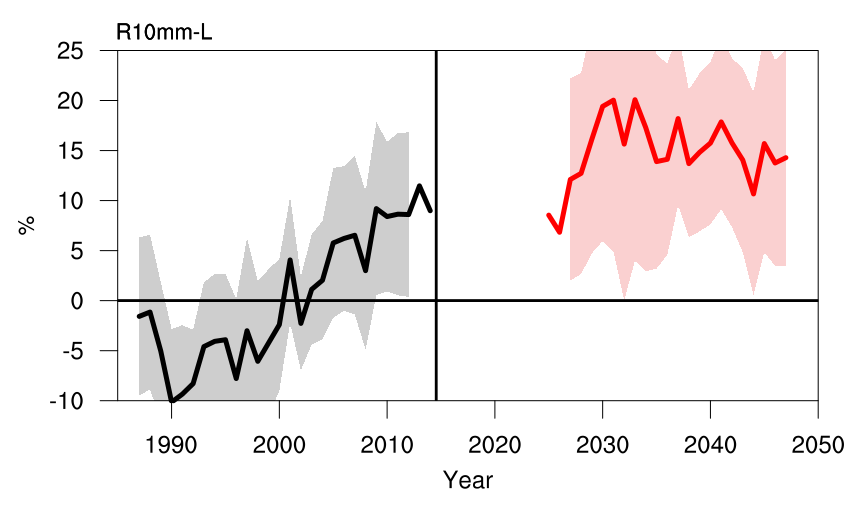


d


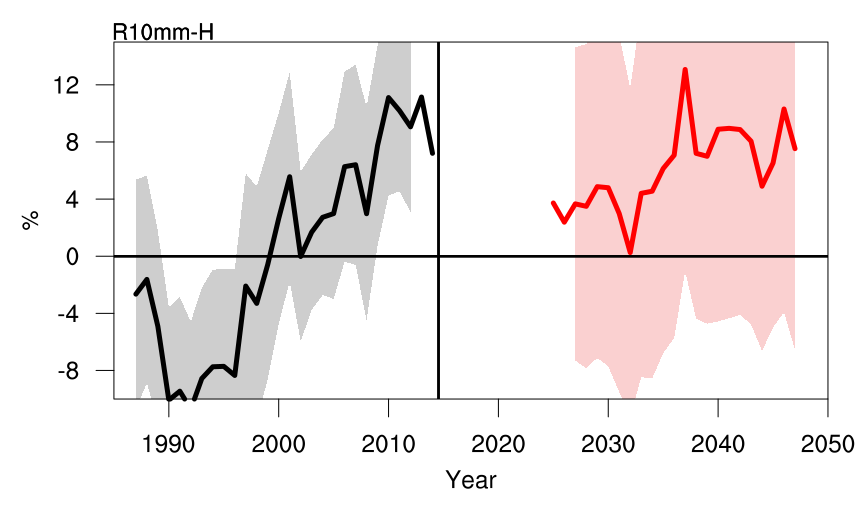


c

Figure S5. Same as figure S1 but for R10mm
